# Supplementary material
Source: PubMed Central journal article supplement (PMC6522285)
Supplement: NIHMS1525135-supplement-7.pdf [file NIHMS1525135-supplement-7.pdf]

# Supplementary Figure 7

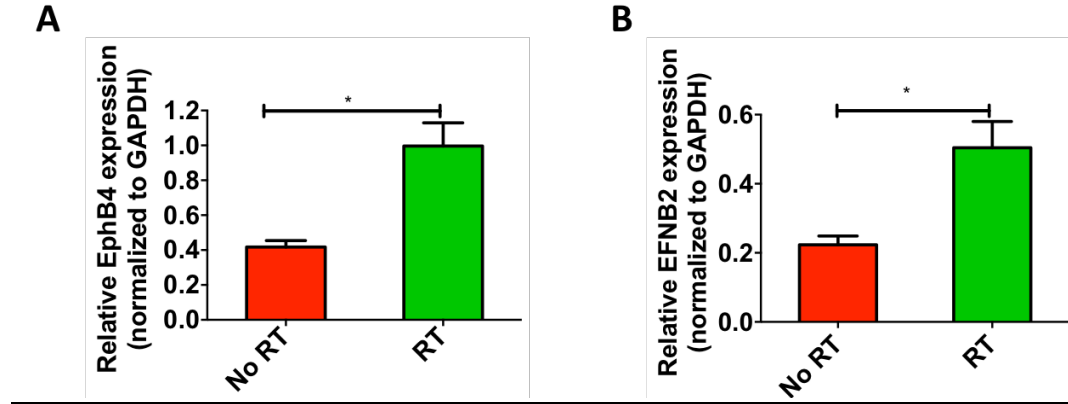

## Ly2

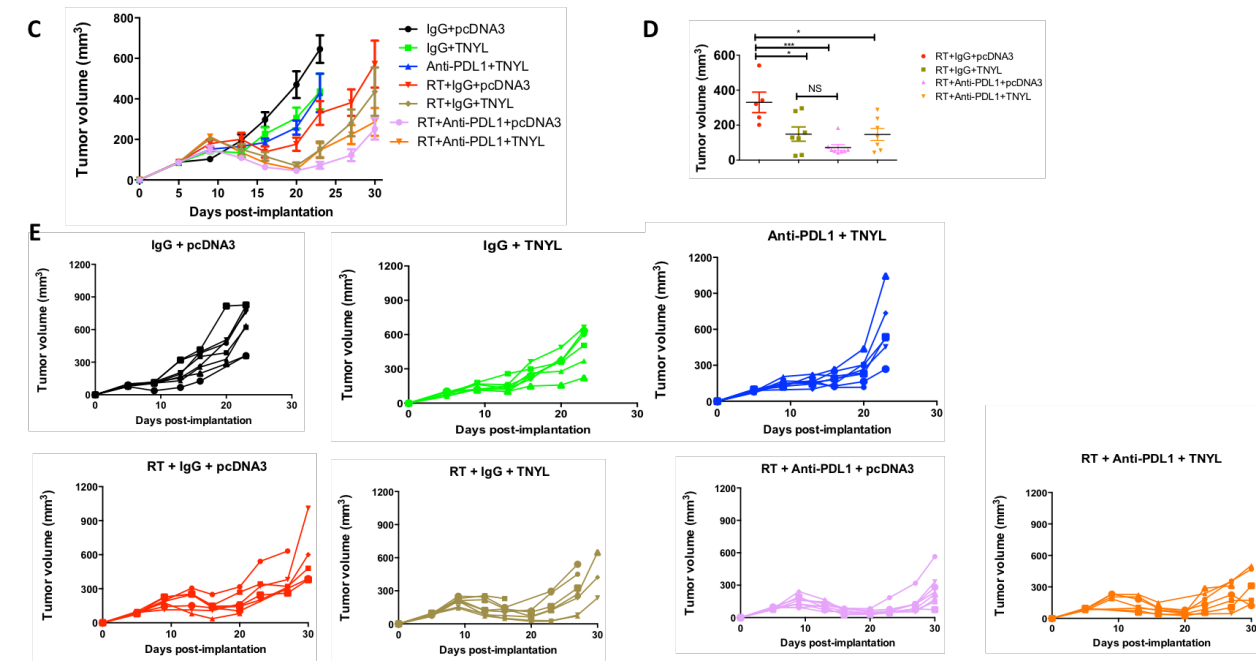

## Moc2

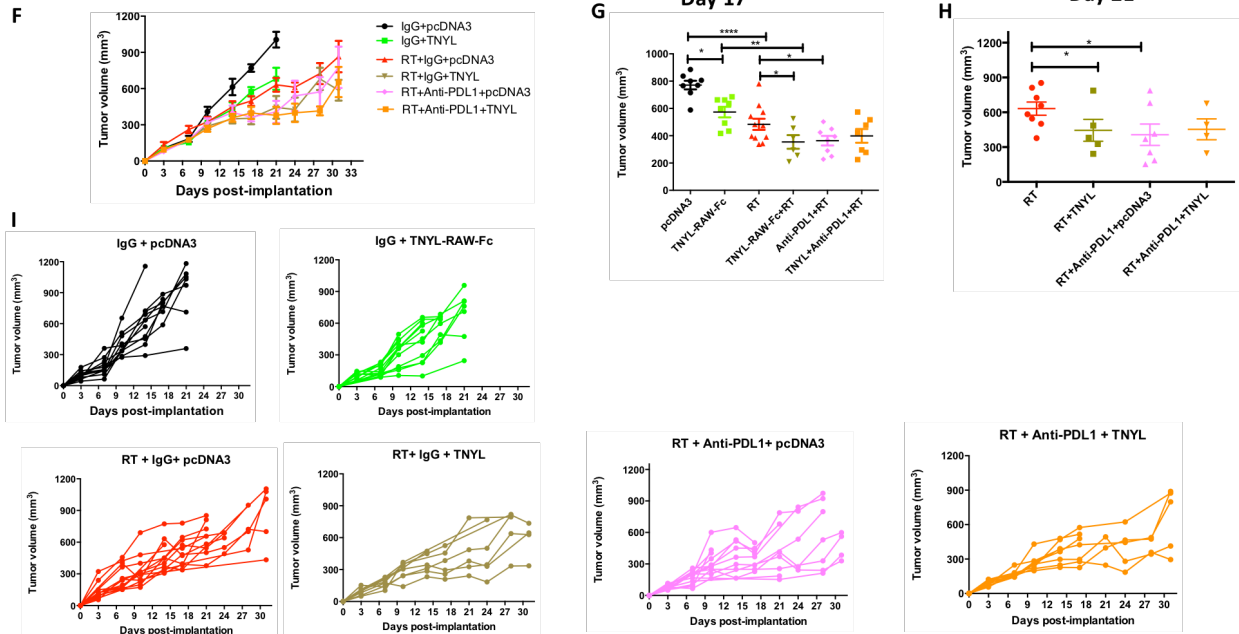

**Supplementary figure 7. Blockade of EphB4-ephrin-B2 interaction combined with RT suppresses tumor growth in HNSCC tumors.** qPCR analysis performed on Ly2 tumors show elevated mRNA levels of both EphB4 (A) and EFNB2 (B) following 10 Gy dose of RT exposure. Inhibition of EphB4-ephrin-B2 interaction by TNYL-RAW-Fc plasmid (20 µg/2 ml PBS/mouse) enhances radiosensitivity of Ly2 (C-E) and Moc2 (F-I) tumors to RT (10 Gy). The dot plot compares tumor volumes between irradiated groups on day 23 post-tumor implantation for Ly2 tumors (D) and on day 17 (G) and day 21 (H) for Moc2 tumors. Tumor volumes of individual mice within a group are represented by spaghetti plots (E, I). One-way ANOVA was used to calculate the significance of the differences between groups. Data represent mean ± SEM. \*p<0.05, \*\*p=0.001-0.01, \*\*\*p=0.0001-0.001.
